# Supplementary material for: Bacterial community composition is an important predictor of surface soil fertility across different land use types: a case study in the Three Gorges Reservoir area
Source: PeerJ. 2025 Mar 27;13:e18959. doi: 10.7717/peerj.18959 (PMC11955195; doi:10.7717/peerj.18959)
Supplement: Supplemental Information 5 [file peerj-13-18959-s005.xlsx]

## Sheet: Sheet1
data id	Sample_name	season	landtype	plants	case	fence	plotID	humanactivity	Ph	MC	AN	AP	AK	TN	TP	TK	SOC	AWCD	shannon	plantdiversity
67	1a	S	P	O	PO	F4	SPO0	6	5.56667	4.27371	19.25	80.87	28.4713	0.234153	1.33686	15.0918	4.07206	0.76814	10.3054	0.22
68	1b	S	P	O	PO	F4	SPO0	6	5.45333	4.29423	26.25	130.654	27.6125	0.242508	1.33792	14.5196	10.2878	0.66857	10.1972	0.22
69	1c	S	P	O	PO	F4	SPO0	6	5.51667	3.67631	33.25	70.8099	24.3416	0.277605	1.22117	13.8196	12.8682	0.693763	10.495	0.22
70	2a	S	P	T	PT	F4	SPT0	6	5.52	3.68535	12.25	60.0819	15.4468	0.226574	0.670791	14.4258	5.81163	0.340989	10.2292	0.04
71	2b	S	P	T	PT	F4	SPT0	6	5.61	4.58138	40.25	65.7815	47.384	0.703047	1.27036	14.6254	21.0048	0.402194	10.497	0.04
72	2c	S	P	T	PT	F4	SPT0	6	5.27	4.2281	47.25	135.037	30.7882	0.700935	0.843765	14.7915	21.5927	0.382452	10.3348	0.04
73	3a	S	P	C	PC	F4	SPC0	6	5.43667	4.6828	19.25	24.2885	19.86	0.253899	1.00326	13.7474	4.98099	0.725247	10.2463	0.07
74	3b	S	P	C	PC	F4	SPC0	6	5.38333	4.57154	26.25	11.2162	19.5346	0.243521	0.135294	14.146	8.98205	0.395817	10.5262	0.07
75	3c	S	P	C	PC	F4	SPC0	6	5.42	3.84139	26.25	14.9405	22.4991	0.455655	0.882662	14.4889	16.4249	0.560532	10.5217	0.07
76	4a	S	P	O	PO	F3	SPO1	6	5.36	4.3993	110.25	140.294	64.7788	0.131062	0.992271	15.5349	12.7433	0.540935	10.0592	0.22
77	4b	S	P	O	PO	F3	SPO1	6	5.14	4.79504	68.25	23.0951	47.4304	1.04536	0.988389	15.281	22.6138	0.810796	9.87021	0.22
78	4c	S	P	O	PO	F3	SPO1	6	5.31333	4.04282	40.25	80.1623	58.3953	0.262861	1.28923	15.7257	23.1007	0.876151	10.3149	0.22
79	5a	S	P	T	PT	F3	SPT1	6	5.43333	4.55275	26.25	4.50412	40.8029	0.281577	0.0551738	15.4234	8.75772	0.714226	10.5691	0.04
80	5b	S	P	T	PT	F3	SPT1	6	5.30333	5.11881	26.25	12.7265	54.7409	0.244371	0.094106	13.6963	14.631	0.707215	10.4153	0.04
81	5c	S	P	T	PT	F3	SPT1	6	5.5	4.68261	47.25	14.3468	53.1745	1.21655	0.630297	14.6545	24.5929	0.635495	10.4733	0.04
82	6a	S	P	C	PC	F3	SPC1	6	5.34	4.43873	47.25	5.42595	41.3943	1.04556	0.804488	15.026	17.8613	0.506495	10.2423	0.07
83	6b	S	P	C	PC	F3	SPC1	6	5.29333	4.55322	40.25	10.4198	47.5113	0.701872	0.601927	13.9986	15.4346	0.481763	10.8267	0.07
84	6c	S	P	C	PC	F3	SPC1	6	5.27	4.96193	61.25	21.1462	65.7385	0.134849	1.27341	15.0059	36.7351	0.480903	10.3199	0.07
85	7a	S	Q	T	FT	NONE	SFT	4	5.12667	4.60191	47.25	67.2323	70.3553	1.27365	0.833458	14.2576	21.4547	0.590204	10.0988	0.07
86	7b	S	Q	T	FT	NONE	SFT	4	4.75667	4.56914	75.25	45.6603	70.0836	0.789177	1.00829	14.905	20.7795	0.986011	9.86643	0.07
87	7c	S	Q	T	FT	NONE	SFT	4	4.65	4.98064	138.25	34.7812	83.0967	1.27784	0.909974	13.5681	32.4947	0.791323	9.23879	0.07
88	8a	S	Q	O	FO	NONE	SFO	4	4.68	4.45688	54.25	11.7473	46.6906	0.569453	0.08629	14.1416	11.417	1.09997	9.92164	0.22
89	8b	S	Q	O	FO	NONE	SFO	4	5.04	4.41751	61.25	31.0222	45.6275	0.452196	0.465619	13.5215	11.8568	0.95429	10.0777	0.22
90	8c	S	Q	O	FO	NONE	SFO	4	5.145	5.01638	54.25	37.939	43.2005	0.478796	0.836307	13.8028	15.5098	0.891376	10.0573	0.22
91	9a	S	S	C	SC	NONE	SSCA	1	5.19	4.49156	47.25	9.5464	33.9796	0.778787	0.890953	15.0611	26.7679	0.989559	10.188	1.76
92	9b	S	S	C	SC	NONE	SSCA	1	5.365	4.38227	68.25	10.09	34.8291	0.702811	0.525726	15.4015	25.8486	1.09517	10.1082	1.76
93	9c	S	S	C	SC	NONE	SSCA	1	5.92	4.58106	68.25	2.21322	40.6378	0.942308	0.844203	15.8366	28.574	0.958925	10.3058	1.76
94	10a	S	S	CT	SCT	NONE	SSCT	1	5.42	4.30463	68.25	0	34.6846	0.257874	0.169101	14.013	17.8363	0.623237	10.0355	1.9
95	10b	S	S	CT	SCT	NONE	SSCT	1	5.42333	4.72844	103.25	0	28.0896	0.791408	0.592051	14.4679	17.6927	0.708591	10.1724	1.9
96	10c	S	S	CT	SCT	NONE	SSCT	1	5.2	4.81043	61.25	0	50.3462	0.248845	0.680621	14.5619	9.22775	0.770946	10.3598	1.9
97	11a	S	S	F	SF	NONE	SSFL	1	4.87	3.30037	64.25	6.43	60.2738	0.834492	0.31262	20.4409	16.7723	0.406613	8.93741	1.99
98	11b	S	S	F	SF	NONE	SSFL	1	4.97333	3.51805	61.25	7.48737	119.352	0.732345	0.294656	19.9923	23.6355	0.359613	9.7622	1.99
99	11c	S	S	F	SF	NONE	SSFL	1	5.01667	5.00284	124.25	8.52629	97.3713	0.515939	0.136227	17.3355	48.3789	0.681387	9.53406	1.99
100	12a	A	P	O	PO	F4	APO0	6	6.03	3.37691	65.1	11.5037	61.0364	0.850963	4.25847	3.74733	5.79308	0.580204	8.95415	0.22
101	12b	A	P	O	PO	F4	APO0	6	5.19	3.19225	79.1	22.7416	71.7532	1.25942	1.6857	4.97848	9.7318	0.42472	8.99231	0.22
102	12C	A	P	O	PO	F4	APO0	6	5.41333	3.55842	75.6	7.91371	49.8231	0.823026	1.54936	3.38405	11.9714	0.29443	9.01209	0.22
103	13a	A	P	T	PT	F4	APT0	6	6.02667	3.64895	56	6.91148	43.4005	0.602849	1.03215	1.78962	9.11651	0.155806	9.38178	0.04
104	13b	A	P	T	PT	F4	APT0	6	5.57667	3.32481	56.7	3.20507	47.098	0.508651	1.20394	3.74733	5.78996	0.478828	8.89011	0.04
105	13C	A	P	T	PT	F4	APT0	6	5.45667	3.57143	65.1	3.54451	49.2229	0.564807	1.30209	3.28313	8.66859	0.771183	8.54478	0.04
106	14a	A	P	C	PC	F4	APC0	6	5.47	3.69399	51.1	1.52491	36.7745	0.516424	0.83291	3.74733	3.38583	0.334108	8.79652	0.07
107	14b	A	P	C	PC	F4	APC0	6	5.69	3.31939	58.1	1.53169	36.625	0.5	0.901054	3.38405	5.35019	0.460892	9.07229	0.07
108	14C	A	P	C	PC	F4	APC0	6	5.76333	3.27353	51.1	1.12117	60.2113	0.515674	1.10666	3.82806	9.95959	0.391065	8.93408	0.07
109	15a	A	P	O	PO	F3	APO1	6	5.86333	3.31412	72.1	15.3749	88.6966	1.15515	1.18095	4.373	13.2594	0.748054	8.42245	0.22
110	15b	A	P	O	PO	F3	APO1	6	5.54333	3.4632	79.1	8.57412	62.5131	1.13945	1.21068	3.88861	15.7004	0.853516	7.89025	0.22
111	15C	A	P	O	PO	F3	APO1	6	6.70667	4.29172	82.6	6.93941	65.6192	2.30812	1.26759	3.42441	28.9315	0.712333	9.18303	0.22
112	16a	A	P	T	PT	F3	APT1	6	6.23	3.3195	68.6	1.7367	39.3819	0.914408	1.13064	4.07026	7.10796	0.319903	8.79473	0.04
113	16b	A	P	T	PT	F3	APT1	6	6.55	3.86364	68.6	1.02428	35.7529	1.253	1.10289	3.18222	11.7884	0.483215	8.43466	0.04
114	16C	A	P	T	PT	F3	APT1	6	6.59	3.59157	54.6	1.54542	34.3883	1.35419	0.975187	3.56569	9.4482	0.428376	9.50481	0.04
115	17a	A	P	C	PC	F3	APC1	6	5.92667	3.42895	54.6	1.00363	25.2763	0.424521	0.662887	3.72715	4.47638	0.42472	8.901	0.07
116	17b	A	P	C	PC	F3	APC1	6	5.99	3.53607	61.6	1.01178	24.0124	0.754967	1.44021	3.52532	8.66542	0.62028	8.96575	0.07
117	17C	A	P	C	PC	F3	APC1	6	6.12333	3.48989	65.1	1.54542	28.9633	0.959758	1.13551	3.44459	15.2645	0.88328	9.35125	0.07
118	18a	A	Q	T	FT	NONE	AFT	4	5.62	3.22703	86.1	2.33083	57.5691	1.22108	1.06689	2.83911	16.3206	0.774183	8.70822	0.07
119	18b	A	Q	T	FT	NONE	AFT	4	4.80667	3.10897	110.6	5.42887	56.3284	1.25863	1.12839	3.58587	18.2739	0.479108	8.23036	0.07
120	18C	A	Q	T	FT	NONE	AFT	4	5.25667	3.35175	100.1	6.73039	65.9713	1.11733	1.17886	3.16204	16.1219	0.414882	8.82932	0.07
121	19a	A	Q	O	FO	NONE	AFO	4	5.54	3.5499	110.6	4.17733	124.949	0.905122	0.91494	3.2024	24.7446	0.443344	9.27062	0.22
122	19b	A	Q	O	FO	NONE	AFO	4	5.19333	3.43241	121.1	3.8834	122.091	1.35861	1.01603	3.82806	18.7751	0.551817	9.24101	0.22
123	19C	A	Q	O	FO	NONE	AFO	4	5.29667	3.58999	138.6	1.15767	126.528	0.787666	0.880448	3.08131	15.06	0.954613	9.28835	0.22
124	20a	A	S	C	SC	NONE	ASCA	1	5.75	3.59422	89.6	1.17405	42.0281	1.02147	0.752081	2.67765	17.7049	0.632656	9.02452	1.76
125	20b	A	S	C	SC	NONE	ASCA	1	5.58333	3.49453	96.6	1.13136	48.2539	1.66844	1.03809	3.70697	17.6866	0.575387	8.24576	1.76
126	20C	A	S	C	SC	NONE	ASCA	1	5.63	3.84356	107.1	1.53852	54.6452	1.77199	0.798061	3.26295	29.9013	0.797763	8.60966	1.76
127	21a	A	S	CT	SCT	NONE	ASCT	1	5.52667	3.78215	96.6	1.33078	47.6821	1.29967	0.630018	2.59692	12.6616	0.541925	8.58717	1.9
128	21b	A	S	CT	SCT	NONE	ASCT	1	5.60667	3.1934	82.6	1.12624	70.1504	0.815936	0.886474	3.34368	14.34	0.553882	8.65778	1.9
129	21C	A	S	CT	SCT	NONE	ASCT	1	5.12333	3.75648	114.1	1.43364	59.2101	0.898467	0.654129	4.07026	13.0996	0.650688	8.71297	1.9
130	22a	A	S	F	SF	NONE	ASFL	1	4.16667	3.74691	135.1	1.18523	112.477	2.56369	0.545979	4.15099	35.3886	0.665903	7.89303	1.99
131	22b	A	S	F	SF	NONE	ASFL	1	4.90333	3.33333	124.6	1.14174	119.519	0.432893	0.638197	3.90879	17.8768	0.39371	8.53031	1.99
132	22C	A	S	F	SF	NONE	ASFL	1	4.33667	2.86094	121.1	1.13136	107.364	0.201354	0.39966	4.77665	19.5394	0.457516	8.11364	1.99
